# Supplementary material
Source: publisher figshare collection journal article supplement (https://acs.figshare.com/ndownloader/files/16235279)
Supplement: Supplementary file 1 [file 16235279]

## **Comparison of cytotoxicity evaluation of anticancer drugs between real-time cell analysis and CCK-8 method**

Ling Cai<sup>1#</sup>, Xijiang Qin<sup>1#</sup>, Zhihui Xu<sup>1</sup>, Yiyan Song<sup>1</sup>, Huijun Jiang<sup>2</sup>,  
Yuan Wu<sup>3</sup>, Hongjie Ruan<sup>4</sup>, Jin Chen<sup>1,5,6\*</sup>

<sup>1</sup>School of Public Health, Nanjing Medical University, Nanjing 211166, China

<sup>2</sup>School of Pharmacy, Nanjing Medical University, Nanjing 211166, China

<sup>3</sup>Department of Medical Oncology, Jiangsu Cancer Hospital, Jiangsu Institute of Cancer Research, The Affiliated Cancer Hospital of Nanjing Medical University, Nanjing 210009, China

<sup>4</sup>Department of gynecology, Obstetrics and Gynecology Hospital Affiliated to Nanjing Medical University, Nanjing, 210004, China

<sup>5</sup>The Key Laboratory of Modern Toxicology, Ministry of Education, School of Public Health, Nanjing Medical University, Nanjing 211166, Jiangsu, China

<sup>6</sup>Center for Global Health, School of Public Health, Nanjing Medical University, Nanjing 211166, Jiangsu, China

\*Correspondence and request for materials should be addressed to J.C. (email: okachen30@gmail.com; jchen@njmu.edu.cn)

#Equal contribution

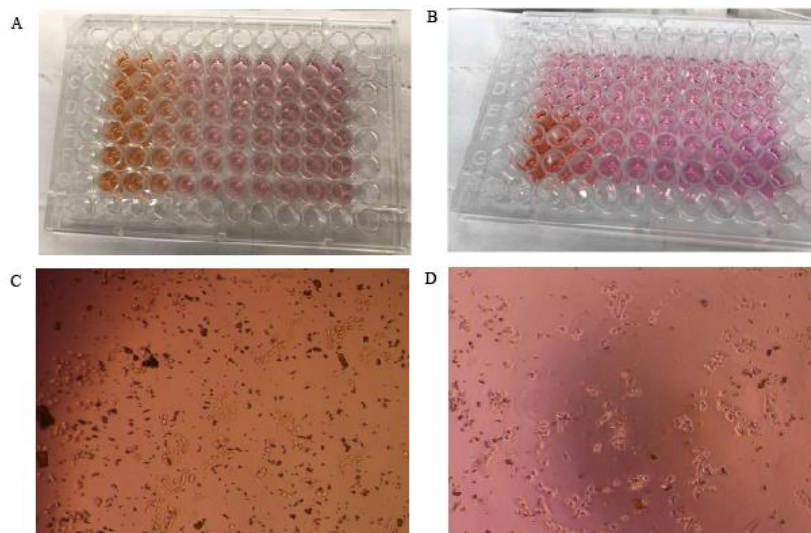

Figure S1 Images of HeLa cultured with curcumin. Photographs of the 96-well plate containing (A) HeLa cells after 24h-treatment of a series concentrations of curcumin and (B) curcumin-treated HeLa cells , of which row B, C and D were rinsed with fresh DMEM while row E, F and G remained unchanged. Images of the cell sample from the same 96-well plate containing 200  $\mu\text{g/mL}$  curcumin before (C) and after (D) replacing the culture medium.

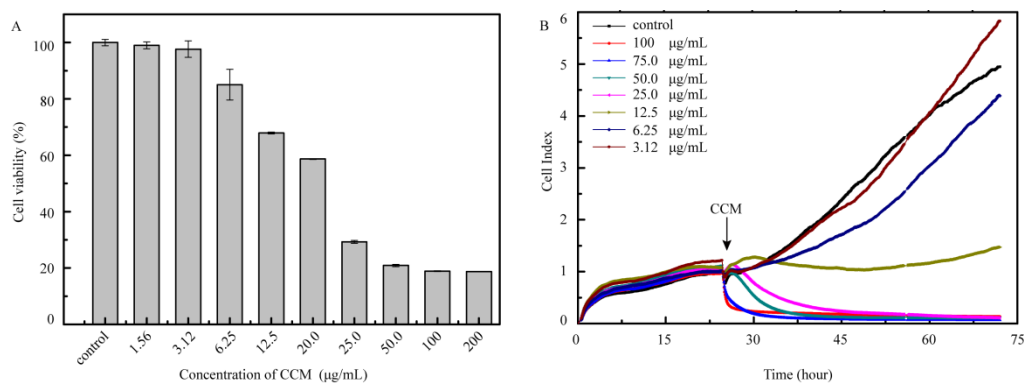

Figure S2 (A) Cell viability of A549 induced by CCM after 24 h in CCK-8 assay; (B) cell growth curve of A549 induced by CCM in RTCA.

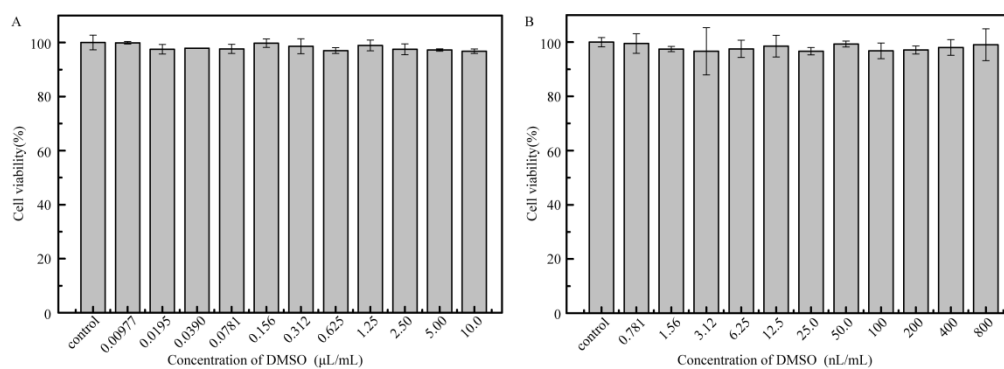

Figure S3 Cell viability of HeLa cells induced by DMSO after 24 h (A) and 48 h (B) in CCK-8 assay.
